# Supplementary material
Source: publisher figshare collection journal article supplement (https://acs.figshare.com/ndownloader/files/5158630)
Supplement: Supplementary file 1 [file 5158630]

 
data_en100
 
_audit_creation_method            SHELXL-97
_chemical_name_systematic
;
 ?
;
_chemical_name_common             ?
_chemical_melting_point           ?
_chemical_formula_moiety          
 'C13 H12 N2 O'
_chemical_formula_sum
 'C13 H12 N2 O'
_chemical_formula_weight          212.25
 
loop_
 _atom_type_symbol
 _atom_type_description
 _atom_type_scat_dispersion_real
 _atom_type_scat_dispersion_imag
 _atom_type_scat_source
 'C'  'C'   0.0033   0.0016
 'International Tables Vol C Tables 4.2.6.8 and 6.1.1.4'
 'H'  'H'   0.0000   0.0000
 'International Tables Vol C Tables 4.2.6.8 and 6.1.1.4'
 'N'  'N'   0.0061   0.0033
 'International Tables Vol C Tables 4.2.6.8 and 6.1.1.4'
 'O'  'O'   0.0106   0.0060
 'International Tables Vol C Tables 4.2.6.8 and 6.1.1.4'
 
_symmetry_cell_setting            Orthorhombic
_symmetry_space_group_name_H-M    Pbcn
 
loop_
 _symmetry_equiv_pos_as_xyz
 'x, y, z'
 '-x+1/2, -y+1/2, z+1/2'
 'x+1/2, -y+1/2, -z'
 '-x, y, -z+1/2'
 '-x, -y, -z'
 'x-1/2, y-1/2, -z-1/2'
 '-x-1/2, y-1/2, z'
 'x, -y, z-1/2'
 
_cell_length_a                    11.1582(2)
_cell_length_b                    10.6203(2)
_cell_length_c                    17.8002(3)
_cell_angle_alpha                 90.00
_cell_angle_beta                  90.00
_cell_angle_gamma                 90.00
_cell_volume                      2109.39(7)
_cell_formula_units_Z             8
_cell_measurement_temperature     100(2)
_cell_measurement_reflns_used     3229
_cell_measurement_theta_min       2.910
_cell_measurement_theta_max       30.034
 
_exptl_crystal_description        'block'
_exptl_crystal_colour             'brown-red'
_exptl_crystal_size_max           0.45
_exptl_crystal_size_mid           0.125
_exptl_crystal_size_min           0.125
_exptl_crystal_density_meas       ?
_exptl_crystal_density_diffrn     1.337
_exptl_crystal_density_method     'not measured'
_exptl_crystal_F_000              896
_exptl_absorpt_coefficient_mu     0.087
_exptl_absorpt_correction_type    'none'
_exptl_absorpt_correction_T_min   ?
_exptl_absorpt_correction_T_max   ?
_exptl_absorpt_process_details    ?
 
_exptl_special_details
;
 ?
;
 
_diffrn_ambient_temperature       100(2)
_diffrn_radiation_wavelength      0.71073
_diffrn_radiation_wavelength_id all
_diffrn_radiation_type            MoK\a
_diffrn_radiation_source          'fine-focus sealed tube'
_diffrn_radiation_monochromator   graphite
_diffrn_measurement_device_type   'KappaCCD'
_diffrn_measurement_method        
;
179 frames via \f rotation and 110 frames via \o rotation   
(rotation angle 1\%) and 2*60 s per frame   
;   
_diffrn_detector_area_resol_mean  
;
1242 (horizontal) x 1152 (vertical) pixels, CCD pixel size is 22.5 x 22.5 \mm
which gives at the input a pixel of 110 x 110 \mm (with 2 x 2 binning)
;
_diffrn_standards_number          ?
_diffrn_standards_interval_count  ?
_diffrn_standards_interval_time   ?
_diffrn_standards_decay_%         ?
_diffrn_reflns_number             19542 
_diffrn_reflns_av_R_equivalents   0.0354
_diffrn_reflns_av_sigmaI/netI     0.0479
_diffrn_reflns_limit_h_min        -15
_diffrn_reflns_limit_h_max        15
_diffrn_reflns_limit_k_min        -14
_diffrn_reflns_limit_k_max        14
_diffrn_reflns_limit_l_min        -24
_diffrn_reflns_limit_l_max        22
_diffrn_reflns_theta_min          2.93
_diffrn_reflns_theta_max          30.03
_reflns_number_total              2951
_reflns_number_gt                 2266
_reflns_threshold_expression      I>2\s(I)
 
_computing_data_collection        
 'Collect data collection software (Nonius B.V., 1998)' 
_computing_cell_refinement        
 'Denzo and Scalepak (Otwinowski & Minor, 1997)'  
_computing_data_reduction         
 'Denzo and Scalepak (Otwinowski & Minor, 1997)' 
_computing_structure_solution     'SHELXS-97 (Sheldrick, 1990)' 
_computing_structure_refinement   'SHELXL-97 (Sheldrick, 1997)' 
_computing_molecular_graphics     'ORTEP-3 (Johnson & Burnet, 1996)' 
_computing_publication_material   ? 
 
_refine_special_details
;
 Refinement of F^2^ against ALL reflections.  The weighted R-factor wR and
 goodness of fit S are based on F^2^, conventional R-factors R are based
 on F, with F set to zero for negative F^2^. The threshold expression of
 F^2^ > 2sigma(F^2^) is used only for calculating R-factors(gt) etc. and is
 not relevant to the choice of reflections for refinement.  R-factors based
 on F^2^ are statistically about twice as large as those based on F, and R-
 factors based on ALL data will be even larger.
;
 
_refine_ls_structure_factor_coef  Fsqd
_refine_ls_matrix_type            full
_refine_ls_weighting_scheme       calc
_refine_ls_weighting_details
 'calc w=1/[\s^2^(Fo^2^)+(0.0472P)^2^+0.3798P] where P=(Fo^2^+2Fc^2^)/3'
_atom_sites_solution_primary      direct
_atom_sites_solution_secondary    difmap
_atom_sites_solution_hydrogens    geom
_refine_ls_hydrogen_treatment     mixed
_refine_ls_extinction_method      SHELXL
_refine_ls_extinction_coef        0.0051(15)
_refine_ls_extinction_expression
 'Fc^*^=kFc[1+0.001xFc^2^\l^3^/sin(2\q)]^-1/4^'
_refine_ls_number_reflns          2951
_refine_ls_number_parameters      154
_refine_ls_number_restraints      0
_refine_ls_R_factor_all           0.0684
_refine_ls_R_factor_gt            0.0464
_refine_ls_wR_factor_ref          0.1059
_refine_ls_wR_factor_gt           0.1001
_refine_ls_goodness_of_fit_ref    1.062
_refine_ls_restrained_S_all       1.062
_refine_ls_shift/su_max           0.000
_refine_ls_shift/su_mean          0.000
 
loop_
 _atom_site_label
 _atom_site_type_symbol
 _atom_site_fract_x
 _atom_site_fract_y
 _atom_site_fract_z
 _atom_site_U_iso_or_equiv
 _atom_site_adp_type
 _atom_site_occupancy
 _atom_site_symmetry_multiplicity
 _atom_site_calc_flag
 _atom_site_refinement_flags
 _atom_site_disorder_assembly
 _atom_site_disorder_group
O1 O 0.45050(8) 0.21236(8) 0.33910(5) 0.0211(2) Uani 1 1 d . . .
H1 H 0.512(2) 0.2558(19) 0.3157(12) 0.029(6) Uiso 0.73(2) 1 d P . .
N2 N 0.62959(9) 0.36177(9) 0.31873(6) 0.0184(2) Uani 1 1 d . . .
H2 H 0.590(6) 0.308(5) 0.301(3) 0.029(6) Uiso 0.27(2) 1 d P . .
N3 N 0.17960(9) 0.34363(9) 0.42243(6) 0.0208(2) Uani 1 1 d . . .
C4 C 0.44607(10) 0.25877(10) 0.40933(7) 0.0174(3) Uani 1 1 d . . .
C5 C 0.52460(10) 0.34509(10) 0.43562(7) 0.0174(2) Uani 1 1 d . . .
H5 H 0.5170 0.3710 0.4865 0.021 Uiso 1 1 calc R . .
C6 C 0.61955(10) 0.40045(10) 0.39116(7) 0.0167(2) Uani 1 1 d . . .
C7 C 0.69682(10) 0.49359(11) 0.41957(7) 0.0188(3) Uani 1 1 d . . .
H7 H 0.6918 0.5184 0.4708 0.023 Uiso 1 1 calc R . .
C8 C 0.77986(11) 0.54868(11) 0.37265(7) 0.0224(3) Uani 1 1 d . . .
H8 H 0.8318 0.6124 0.3912 0.027 Uiso 1 1 calc R . .
C9 C 0.78725(11) 0.51055(11) 0.29795(8) 0.0244(3) Uani 1 1 d . . .
H9 H 0.8427 0.5487 0.2645 0.029 Uiso 1 1 calc R . .
C10 C 0.71159(11) 0.41548(11) 0.27388(7) 0.0222(3) Uani 1 1 d . . .
H10 H 0.7180 0.3870 0.2234 0.027 Uiso 1 1 calc R . .
C11 C 0.34535(10) 0.20573(11) 0.45557(7) 0.0187(3) Uani 1 1 d . . .
H11A H 0.3454 0.2463 0.5057 0.022 Uiso 1 1 calc R . .
H11B H 0.3583 0.1143 0.4629 0.022 Uiso 1 1 calc R . .
C12 C 0.22495(10) 0.22652(10) 0.41843(6) 0.0163(3) Uani 1 1 d . . .
C13 C 0.16710(11) 0.12934(11) 0.38091(6) 0.0187(3) Uani 1 1 d . . .
H13 H 0.2018 0.0477 0.3791 0.022 Uiso 1 1 calc R . .
C14 C 0.05851(11) 0.15246(11) 0.34624(7) 0.0208(3) Uani 1 1 d . . .
H14 H 0.0180 0.0874 0.3198 0.025 Uiso 1 1 calc R . .
C15 C 0.00971(12) 0.27212(11) 0.35069(7) 0.0227(3) Uani 1 1 d . . .
H15 H -0.0654 0.2908 0.3281 0.027 Uiso 1 1 calc R . .
C16 C 0.07335(11) 0.36363(11) 0.38890(7) 0.0232(3) Uani 1 1 d . . .
H16 H 0.0399 0.4458 0.3916 0.028 Uiso 1 1 calc R . .
 
loop_
 _atom_site_aniso_label
 _atom_site_aniso_U_11
 _atom_site_aniso_U_22
 _atom_site_aniso_U_33
 _atom_site_aniso_U_23
 _atom_site_aniso_U_13
 _atom_site_aniso_U_12
O1 0.0200(5) 0.0243(4) 0.0188(5) -0.0035(3) 0.0008(4) -0.0041(3)
N2 0.0178(5) 0.0198(5) 0.0176(5) 0.0004(4) -0.0015(4) 0.0002(4)
N3 0.0185(5) 0.0191(5) 0.0247(6) -0.0004(4) -0.0006(4) -0.0011(4)
C4 0.0162(6) 0.0174(5) 0.0187(6) 0.0012(4) -0.0004(5) 0.0033(4)
C5 0.0173(6) 0.0193(5) 0.0156(6) -0.0003(4) -0.0014(5) 0.0007(4)
C6 0.0155(6) 0.0166(5) 0.0180(6) 0.0014(4) -0.0018(4) 0.0031(4)
C7 0.0188(6) 0.0180(5) 0.0195(6) -0.0005(4) -0.0033(5) 0.0010(4)
C8 0.0182(6) 0.0191(5) 0.0299(7) 0.0026(5) -0.0040(5) -0.0017(4)
C9 0.0193(6) 0.0260(6) 0.0280(7) 0.0055(5) 0.0017(5) -0.0029(5)
C10 0.0211(6) 0.0257(6) 0.0198(6) 0.0026(5) 0.0006(5) 0.0003(5)
C11 0.0191(6) 0.0187(5) 0.0183(6) 0.0019(4) 0.0002(5) -0.0006(4)
C12 0.0154(6) 0.0186(5) 0.0148(6) 0.0022(4) 0.0039(4) -0.0020(4)
C13 0.0211(6) 0.0176(5) 0.0173(6) 0.0007(4) 0.0021(5) -0.0013(4)
C14 0.0222(6) 0.0236(6) 0.0167(6) -0.0004(5) 0.0000(5) -0.0075(5)
C15 0.0177(6) 0.0278(6) 0.0225(7) 0.0036(5) -0.0017(5) -0.0010(5)
C16 0.0210(6) 0.0202(6) 0.0283(7) 0.0009(5) -0.0010(5) 0.0033(5)
 
_geom_special_details
;
 All esds (except the esd in the dihedral angle between two l.s. planes)
 are estimated using the full covariance matrix.  The cell esds are taken
 into account individually in the estimation of esds in distances, angles
 and torsion angles; correlations between esds in cell parameters are only
 used when they are defined by crystal symmetry.  An approximate (isotropic)
 treatment of cell esds is used for estimating esds involving l.s. planes.
;
 
loop_
 _geom_bond_atom_site_label_1
 _geom_bond_atom_site_label_2
 _geom_bond_distance
 _geom_bond_site_symmetry_2
 _geom_bond_publ_flag
O1 C4 1.3447(15) . ?
N2 C10 1.3417(16) . ?
N2 C6 1.3579(16) . ?
N3 C16 1.3442(16) . ?
N3 C12 1.3446(14) . ?
C4 C5 1.3518(16) . ?
C4 C11 1.5027(16) . ?
C5 C6 1.4472(16) . ?
C6 C7 1.4064(16) . ?
C7 C8 1.3778(17) . ?
C8 C9 1.3923(19) . ?
C9 C10 1.3841(17) . ?
C11 C12 1.5135(16) . ?
C12 C13 1.3884(15) . ?
C13 C14 1.3818(17) . ?
C14 C15 1.3848(17) . ?
C15 C16 1.3826(17) . ?
 
loop_
 _geom_angle_atom_site_label_1
 _geom_angle_atom_site_label_2
 _geom_angle_atom_site_label_3
 _geom_angle
 _geom_angle_site_symmetry_1
 _geom_angle_site_symmetry_3
 _geom_angle_publ_flag
C10 N2 C6 119.52(11) . . ?
C16 N3 C12 117.03(10) . . ?
O1 C4 C5 123.14(11) . . ?
O1 C4 C11 113.54(10) . . ?
C5 C4 C11 123.32(11) . . ?
C4 C5 C6 124.10(11) . . ?
N2 C6 C7 120.24(11) . . ?
N2 C6 C5 117.18(10) . . ?
C7 C6 C5 122.55(11) . . ?
C8 C7 C6 119.54(11) . . ?
C7 C8 C9 119.69(11) . . ?
C10 C9 C8 118.15(11) . . ?
N2 C10 C9 122.81(12) . . ?
C4 C11 C12 111.71(9) . . ?
N3 C12 C13 122.56(11) . . ?
N3 C12 C11 116.47(10) . . ?
C13 C12 C11 120.95(10) . . ?
C14 C13 C12 119.37(11) . . ?
C13 C14 C15 118.84(11) . . ?
C16 C15 C14 118.11(12) . . ?
N3 C16 C15 124.08(11) . . ?
 
loop_
 _geom_torsion_atom_site_label_1
 _geom_torsion_atom_site_label_2
 _geom_torsion_atom_site_label_3
 _geom_torsion_atom_site_label_4
 _geom_torsion
 _geom_torsion_site_symmetry_1
 _geom_torsion_site_symmetry_2
 _geom_torsion_site_symmetry_3
 _geom_torsion_site_symmetry_4
 _geom_torsion_publ_flag
O1 C4 C5 C6 2.06(18) . . . . ?
C11 C4 C5 C6 -177.77(10) . . . . ?
C10 N2 C6 C7 -1.81(16) . . . . ?
C10 N2 C6 C5 176.13(10) . . . . ?
C4 C5 C6 N2 -0.37(17) . . . . ?
C4 C5 C6 C7 177.53(11) . . . . ?
N2 C6 C7 C8 2.40(17) . . . . ?
C5 C6 C7 C8 -175.43(11) . . . . ?
C6 C7 C8 C9 -0.73(17) . . . . ?
C7 C8 C9 C10 -1.42(18) . . . . ?
C6 N2 C10 C9 -0.45(18) . . . . ?
C8 C9 C10 N2 2.08(18) . . . . ?
O1 C4 C11 C12 -56.69(13) . . . . ?
C5 C4 C11 C12 123.15(12) . . . . ?
C16 N3 C12 C13 0.75(17) . . . . ?
C16 N3 C12 C11 179.25(10) . . . . ?
C4 C11 C12 N3 -76.01(13) . . . . ?
C4 C11 C12 C13 102.52(12) . . . . ?
N3 C12 C13 C14 -0.15(17) . . . . ?
C11 C12 C13 C14 -178.58(11) . . . . ?
C12 C13 C14 C15 -0.73(17) . . . . ?
C13 C14 C15 C16 0.96(18) . . . . ?
C12 N3 C16 C15 -0.50(18) . . . . ?
C14 C15 C16 N3 -0.35(19) . . . . ?
 
_diffrn_measured_fraction_theta_max    0.957
_diffrn_reflns_theta_full              30.03
_diffrn_measured_fraction_theta_full   0.957
_refine_diff_density_max    0.275
_refine_diff_density_min   -0.209
_refine_diff_density_rms    0.046
